# Supplementary material
Source: MDPI journal article supplement (https://www.mdpi.com/2504-3900/8/1/21)
Supplement: s1 [file s1]

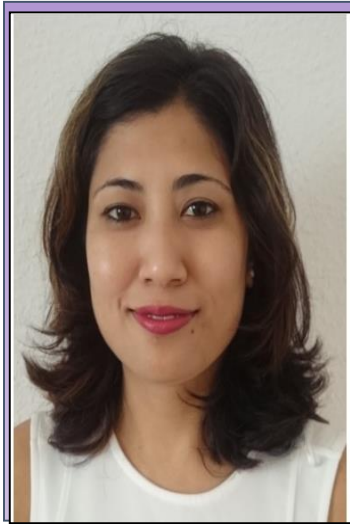

# Evaluation of milk and lactose sensitivity in lactase non-persistence genotype

Shrestha, A<sup>1</sup>., Martinsson, JA<sup>2</sup>., Karlström, HJ<sup>2</sup>., Nilsson, NJ<sup>2</sup>., Barnett, MPG<sup>3,4,5</sup>., Perry, JK<sup>1</sup>., Milan, AM<sup>1</sup>.,Cameron-Smith, D<sup>1,4,5</sup>.

<sup>1</sup>Liggins Institute, University of Auckland, New Zealand, <sup>2</sup>Linköping University, Sweden, <sup>3</sup>High-Value Nutrition National Science Challenge, New Zealand, <sup>4</sup>Riddet Institute, Palmerston North, New Zealand  
<sup>5</sup>Food and Bio-based products, Group, AgResearch, New Zealand

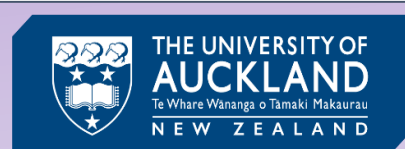

LIGGINS  
INSTITUTE

## Background

- Lactase non-persistence, characterized by inactivity of the lactase enzyme post weaning, results in lactose intolerance. Approximately 75% of the world's population exhibit this trait.
- The single nucleotide polymorphisms (SNPs) C/T<sub>13910</sub> and G/A<sub>22018</sub> are associated with lactase persistence traits but the degree that differing lactase persistence genotypes relate to symptoms and biomarkers of lactose malabsorption (breath H<sub>2</sub>), especially in response to milk, is not well defined
- The lactose in conventional milk (containing A1 β-casein) and a2 milk™ (A1 β-casein free) may be absorbed differently.

## Methods

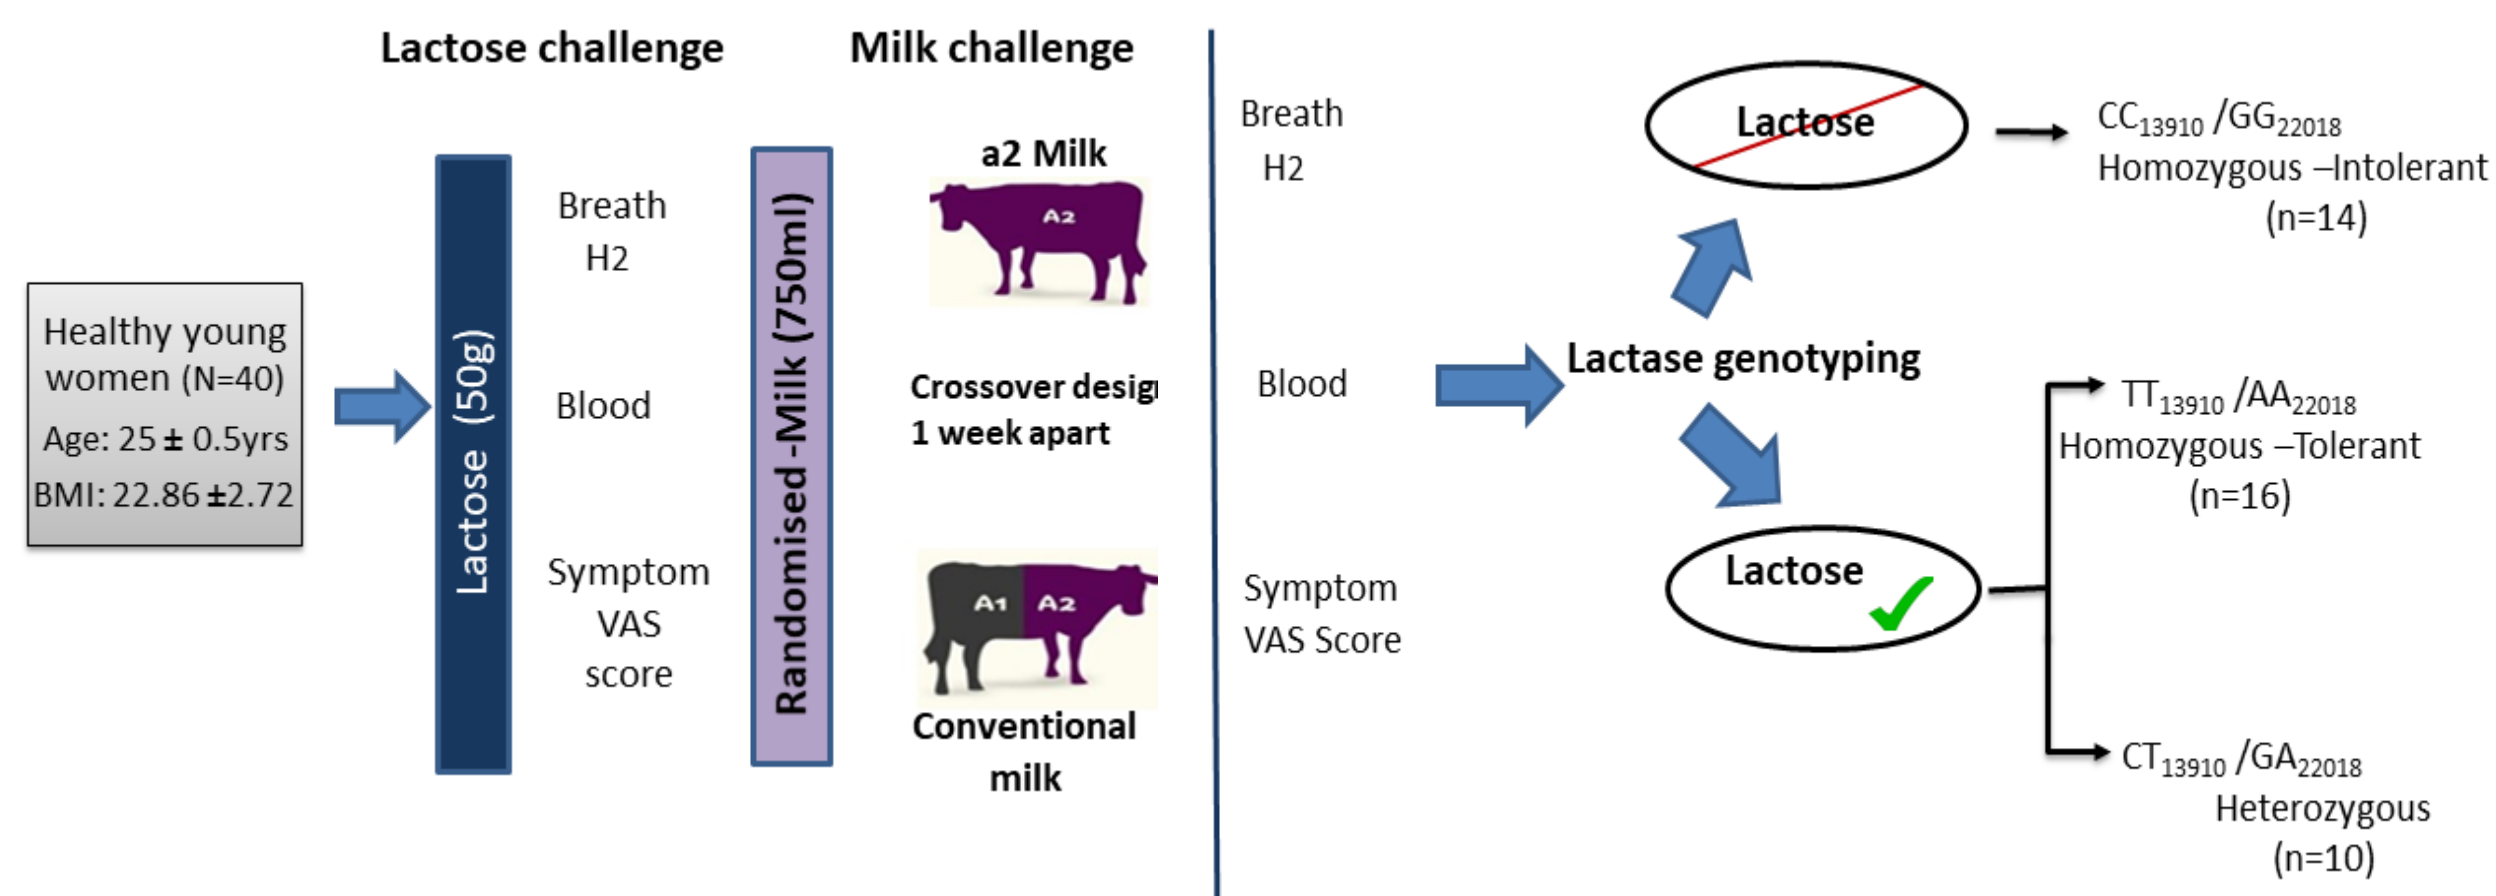

Fig 1) Study design from participant recruitment to intervention, sample collection to group identification by genotyping using restriction fragment length polymorphism.

## Results

### Post Lactose Ingestion

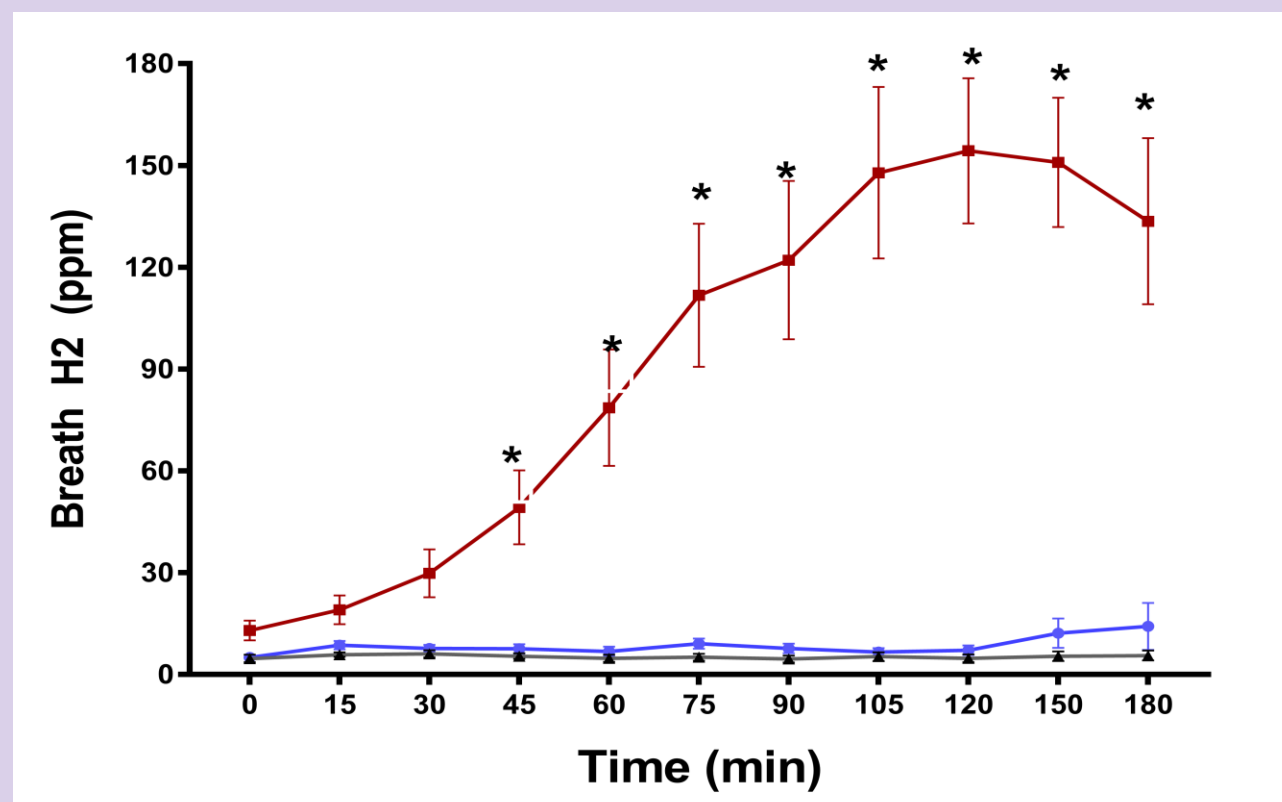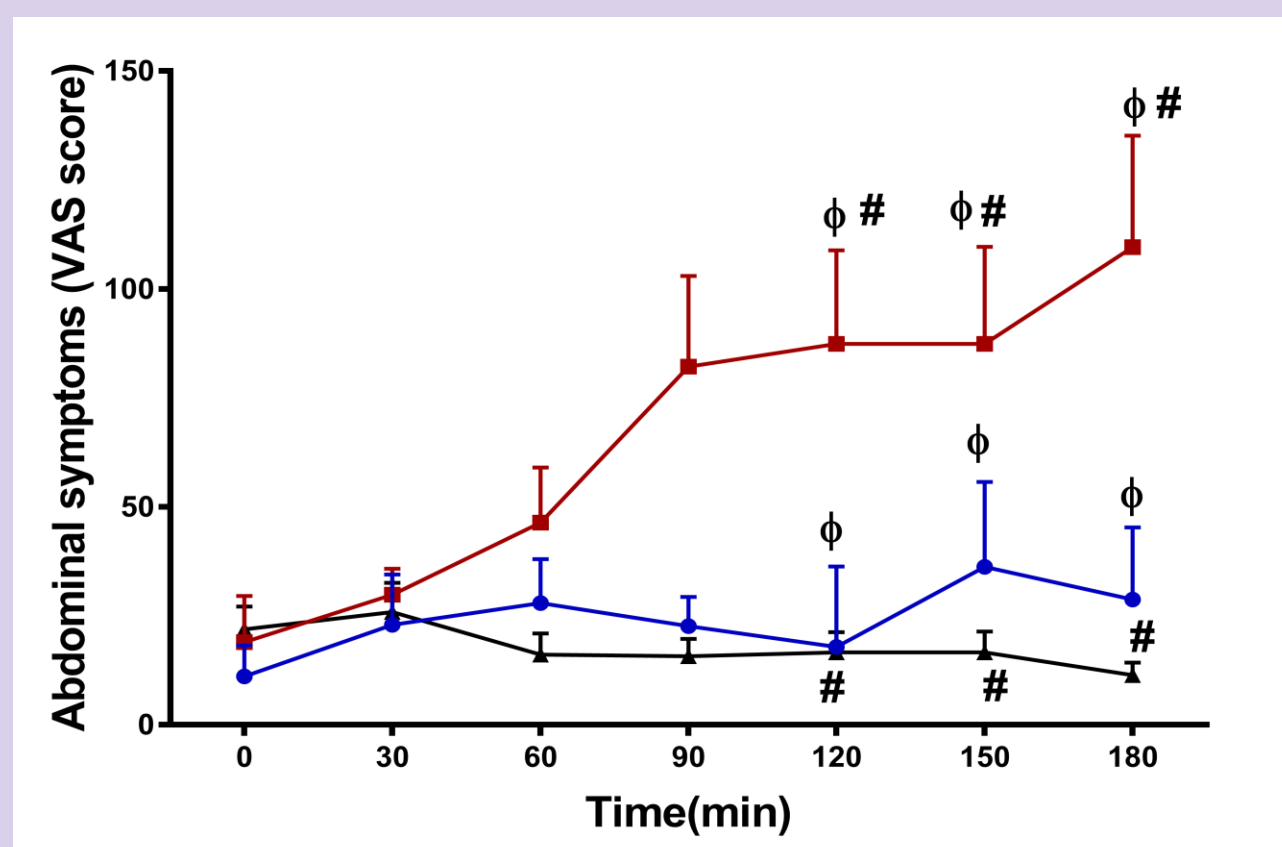

### Post Milk Ingestion

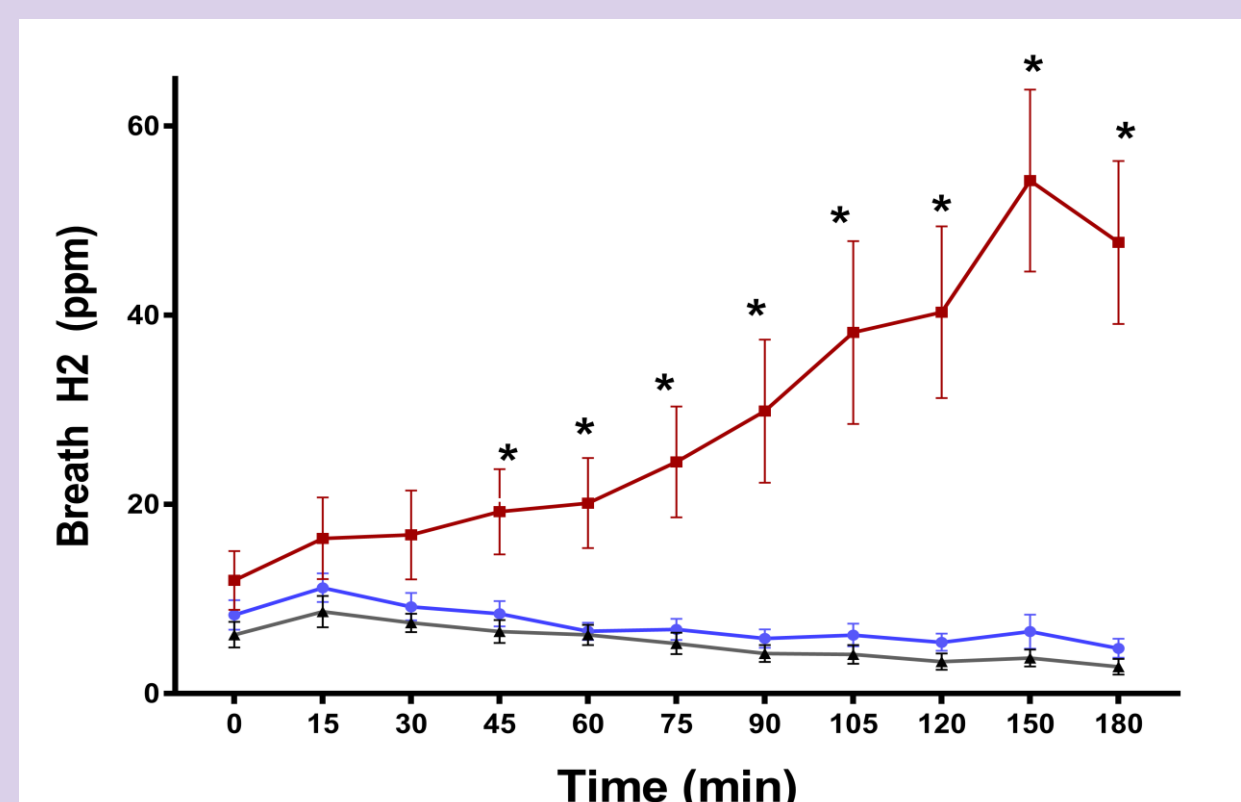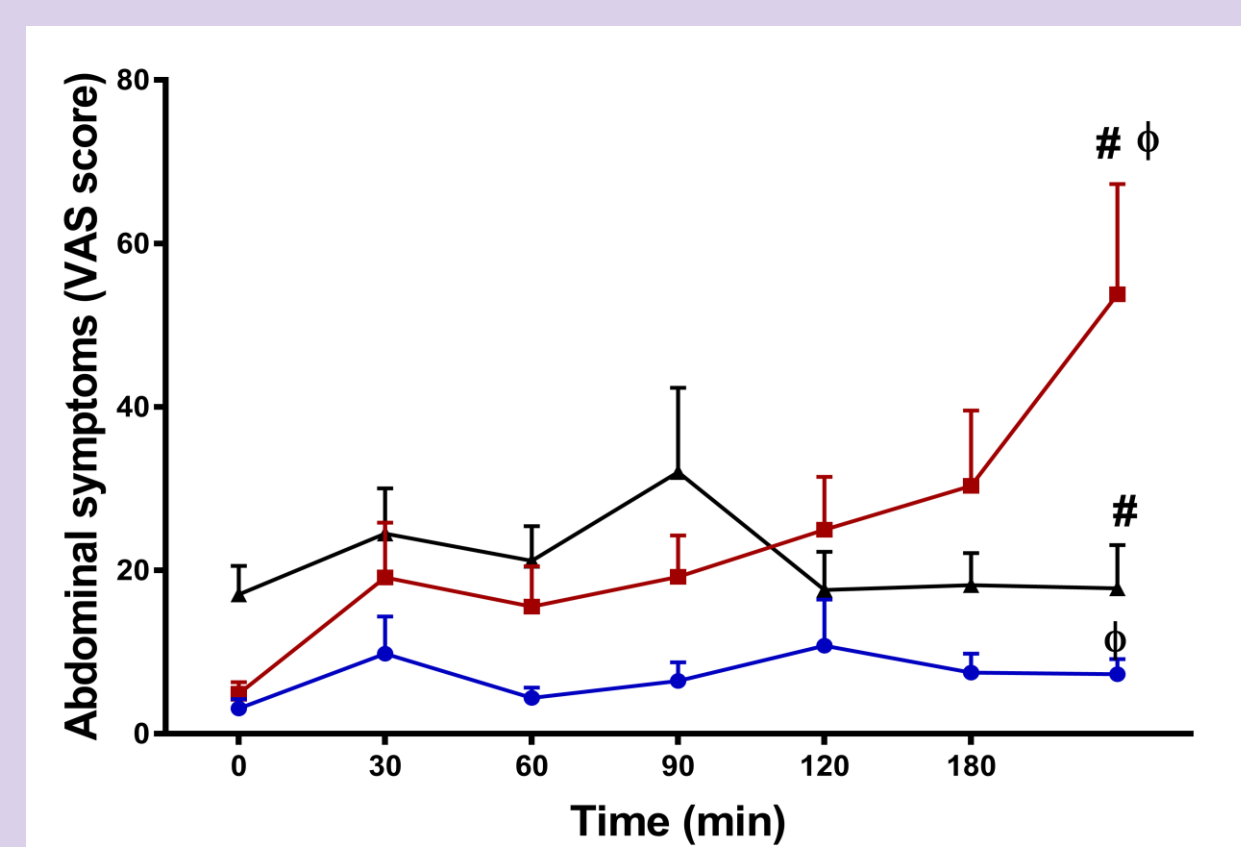

—●— Homozygous intolerant —■— Homozygous tolerant —▲— Heterozygous

**Fig 2. Measure of lactose malabsorption in different genotypes after lactose and milk ingestion.**  
Breath H<sub>2</sub> concentration after a) lactose b) after milk  
Abdominal symptoms after c) lactose and d) after milk  
\* denotes concentration of H<sub>2</sub> is significantly different between homozygous intolerant compared to the other genotypes.  
Φ denotes abdominal symptoms are significantly different between heterozygous and homozygous intolerant  
# denotes abdominal symptoms are significantly different between homozygous tolerant and homozygous intolerant

## Objective

- To explore the differences in lactose intolerance of different genotypes in response to lactose, and to milks with differing casein composition.

## Hypothesis

- The differences in the β-casein content of milk (conventional milk (A1+A2 β-casein), and a2 Milk™, (A1 β-casein free) may influence the lactose absorption which can be accessed by breath H<sub>2</sub> and abdominal symptoms after milk ingestion..

## Discussion

- Homozygous intolerant individuals reported greater increase in breath H<sub>2</sub> and digestive symptoms (abdominal cramps, rumbling, flatulence and diarrhea) after milk and lactose ingestion compared to the other genotypes.
- There was also difference in the breath hydrogen and digestive symptoms between lactose and milk ingestion in homozygous intolerant individuals that was absent in the other genotypes.
- Furthermore, these genotypes reported reduced faecal urgency after a2 Milk™ compared to conventional milk.

### Homozygous Intolerant

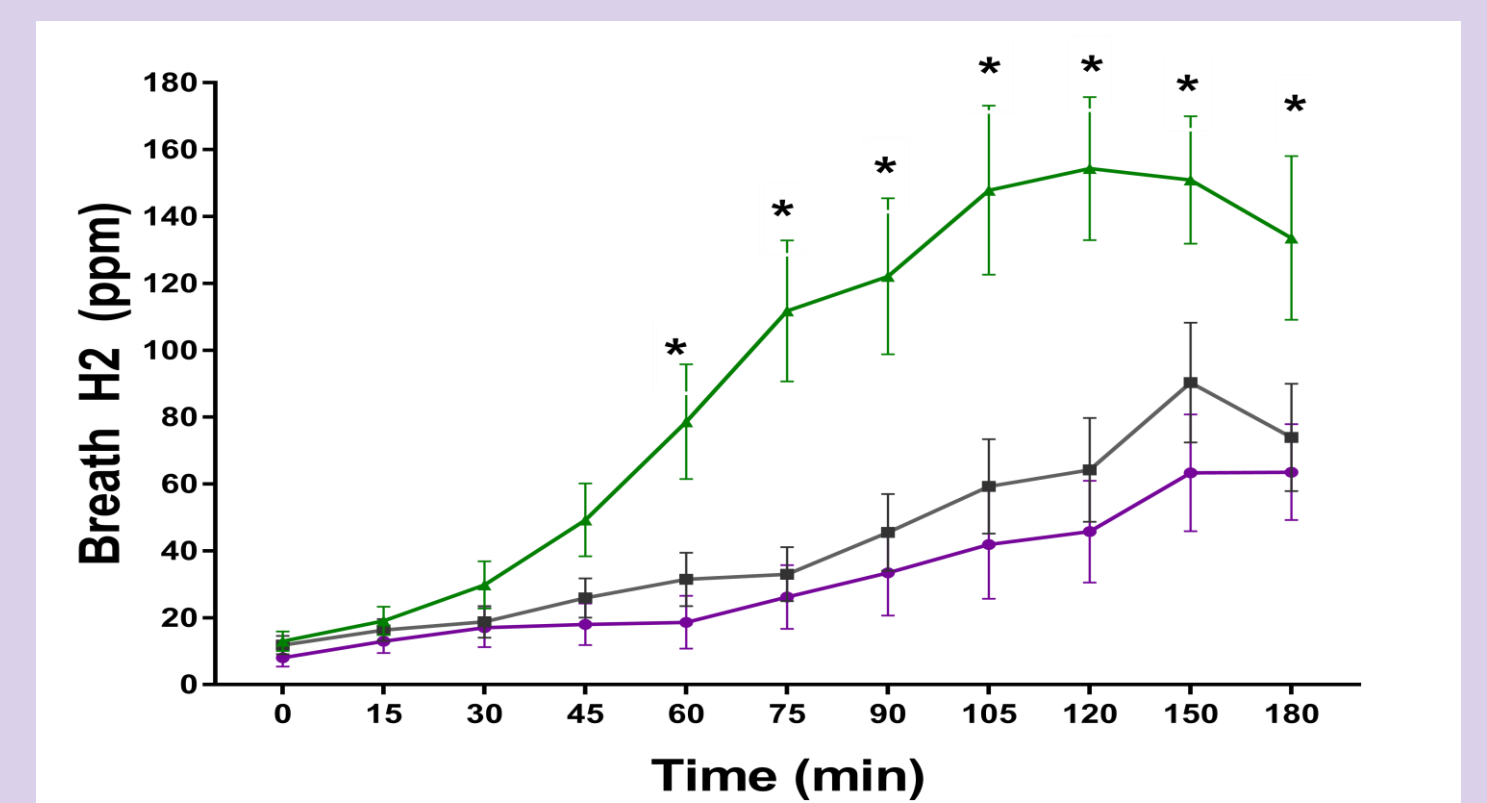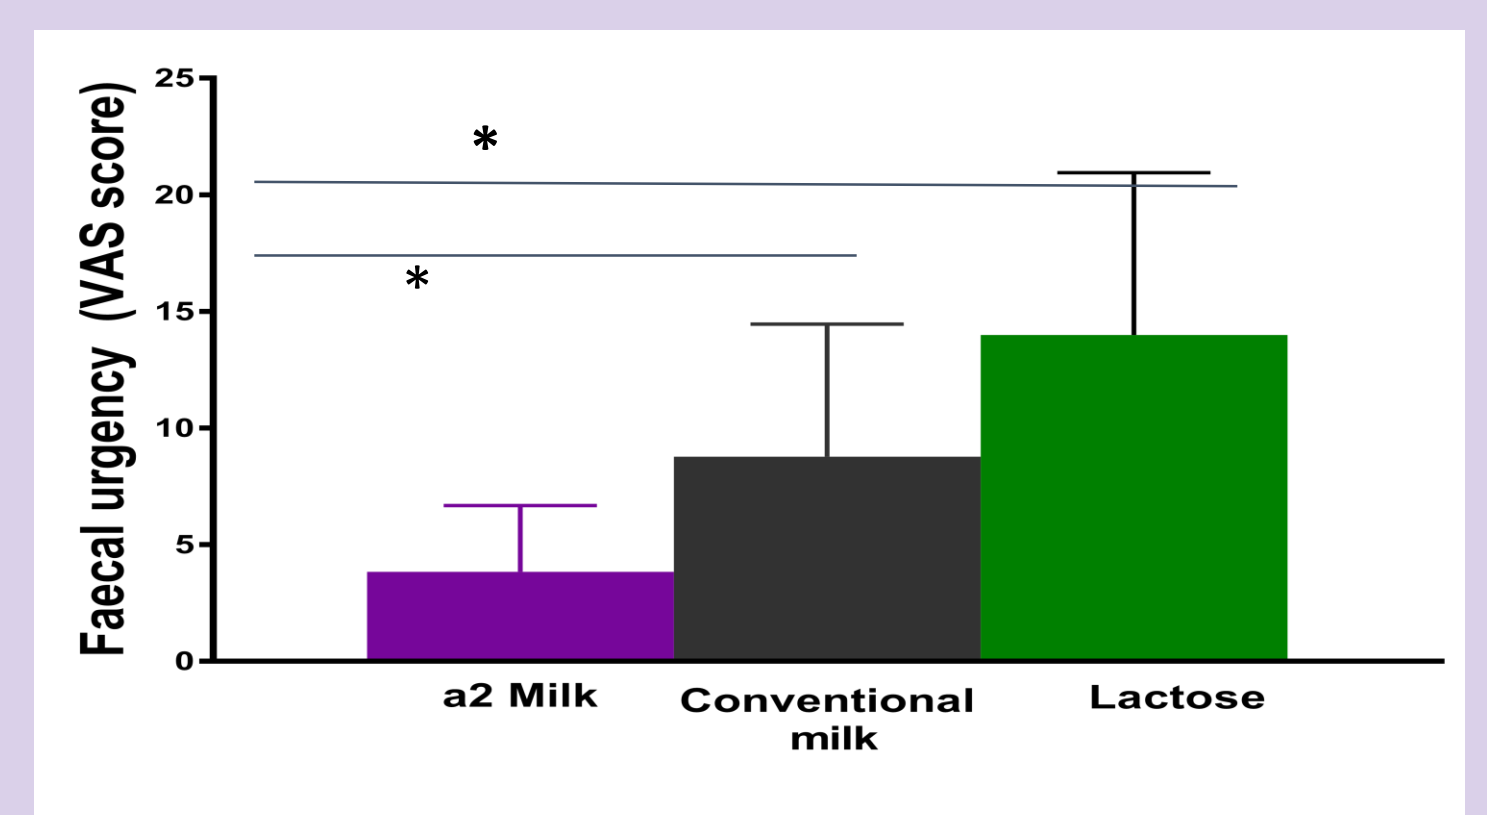

—●— Lactose —▲— a2milk —■— Conventional milk

**Fig 3 Postprandial changes in breath H<sub>2</sub> after lactose, conventional milk and a2 milk in Homozygous intolerant individuals.**  
a)Breath H<sub>2</sub> after lactose, a2 and conventional milk,b)Faecal urgency after a2 milk vs conventional milk ,\*denotes faecal urgency experienced was significantly greater after conventional milk and lactose compared to a2 Milk.

## Conclusions

- Homozygous intolerant individuals (CC<sub>13910</sub>/GG<sub>22018</sub>) had greater malabsorption and digestive discomfort to lactose and milk compared to other genotypes, with the intensity being higher for lactose compared to milk. The prevalence of this genotype is not well established, however it is apparent that these individuals have very limited capacity to tolerate lactose.
- Homozygous intolerant genotype experienced less faecal urgency after a2 Milk™ compared to the conventional milk and lactose. However, long term ingestion of a2 Milk™ may provide better understanding of its benefits in these individuals.
